# Supplementary material
Source: publisher figshare collection journal article supplement (https://acs.figshare.com/ndownloader/files/4205158)
Supplement: Supplementary file 1 [file 4205158]

## Supporting information for

### Nonlithographic Fabrication of Crystalline Silicon Nanodots on Graphene

Guo'an Tai,<sup>†,1,2</sup> Kai Wang,<sup>†,1</sup> Zhenhua Sun,<sup>1</sup> Jun Yin,<sup>2</sup> Sheung Mei Ng,<sup>1</sup> Jianxin Zhou,<sup>2</sup> Feng Yan,<sup>1</sup> Chi Wah Leung,<sup>1</sup>

Kin Hung Wong,<sup>1</sup> Wanlin Guo<sup>2,\*</sup>, and Shu Ping Lau<sup>1,\*</sup>

<sup>1</sup> Department of Applied Physics and Materials Research Centre, The Hong Kong Polytechnic University, Hung Hom, Kowloon, Hong Kong SAR, China

<sup>2</sup> Key Laboratory for Intelligent Nano Materials and Devices of the Ministry of Education and the State Key Laboratory of Mechanics and Control of Mechanical Structures, Institute of Nanoscience, Nanjing University of Aeronautics and Astronautics, Nanjing 210016, China

<sup>†</sup> These authors contributed equally to this work.

\* To whom correspondence should be addressed, [apsplau@polyu.edu.hk](mailto:apsplau@polyu.edu.hk), [wlguo@nuaa.edu.cn](mailto:wlguo@nuaa.edu.cn)

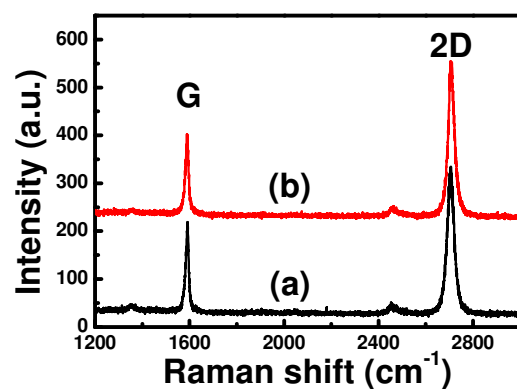

**Figure S1.** Raman spectra of the monolayer graphene samples (a) before and (b) after annealing at 400 °C.

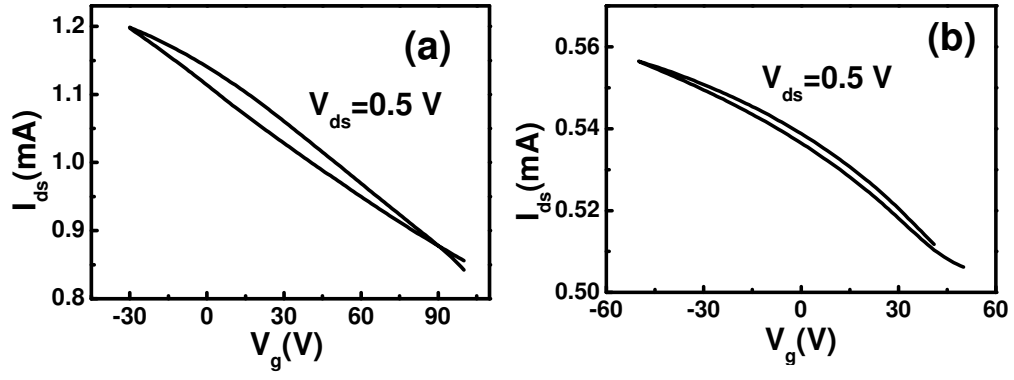

**Figure S2.**  $I_{ds}$ - $V_g$  characteristics of monolayer graphene and graphene decorated with Si nanodots before annealing in pure  $N_2$  environment.
